# Supplementary material for: Perinatal acquisition of drug-resistant HIV-1 infection: mechanisms and long-term outcome
Source: Springer Nature journal article supplement (doi:10.1186/1742-4690-6-85), 2009-09-19
Supplement: 12977_2009_1090_MOESM1_ESM.pdf [file 12977_2009_1090_MOESM1_ESM.pdf]

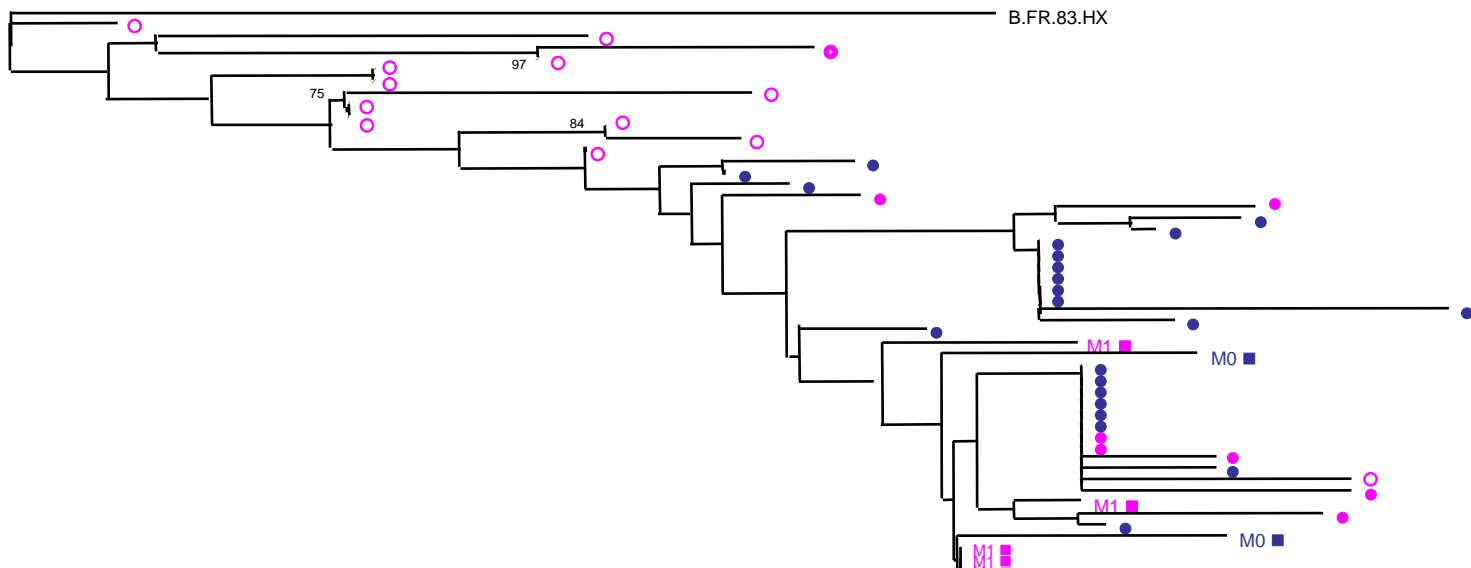

**Child #9**

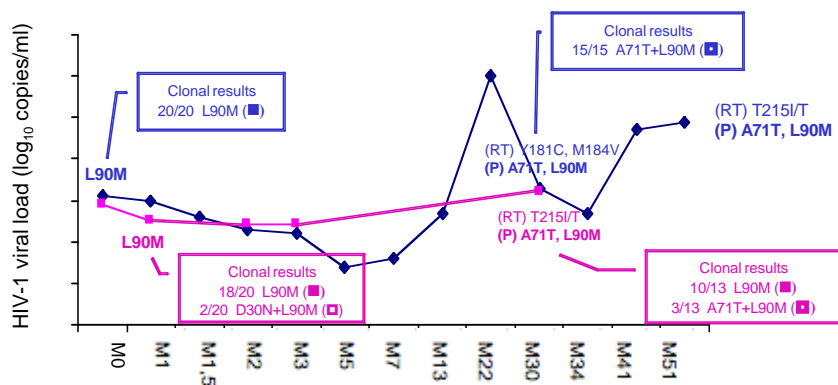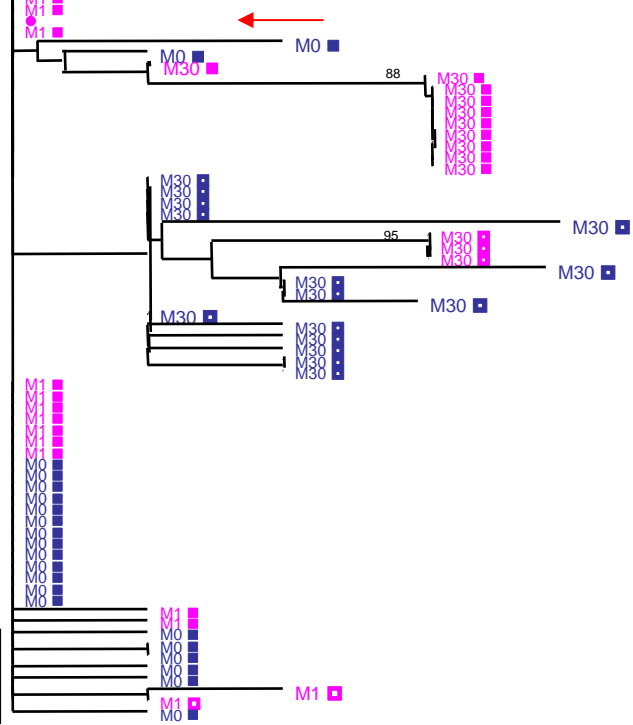

ZDV  
d4T ABCNVP  
ABC 3TCNVP NFV  
ABC d4T LPV/r  
ABC ZDV ATV/r

Mother  
ddI SQV LPV/r

HIV-1-RNA (2.1 log)  
HIV-1-DNA

Clonal results  
21/21 L90M (●)  
12/21 WT (○), 8/21 L90M(●), 1/21 I84V (●)
