# Supplementary material for: Perinatal acquisition of drug-resistant HIV-1 infection: mechanisms and long-term outcome
Source: Springer Nature journal article supplement (doi:10.1186/1742-4690-6-85), 2009-09-19
Supplement: 12977_2009_1090_MOESM2_ESM.pdf [file 12977_2009_1090_MOESM2_ESM.pdf]

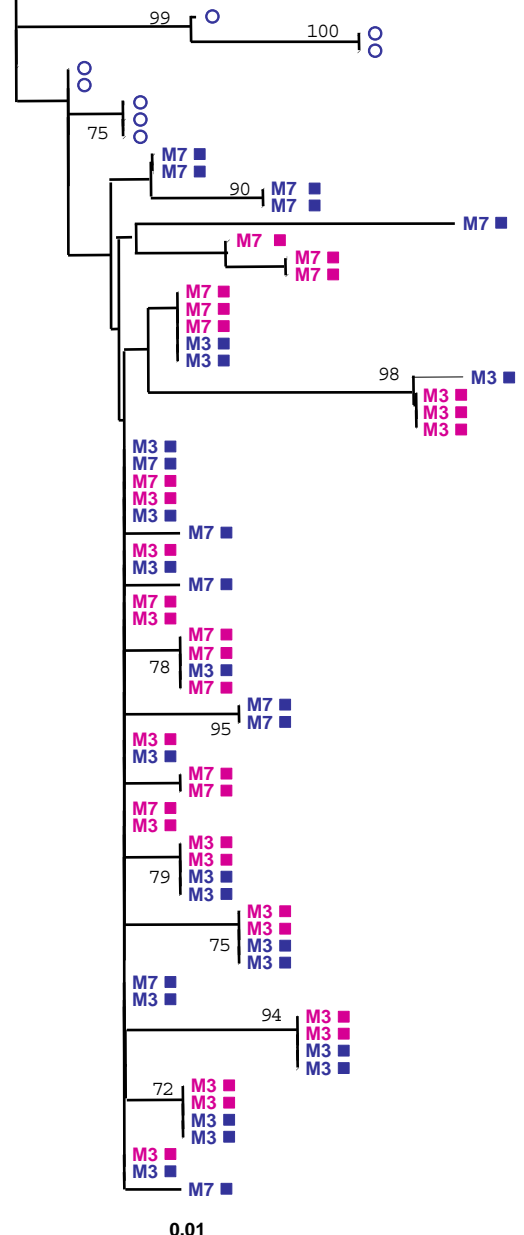

**Child #11**

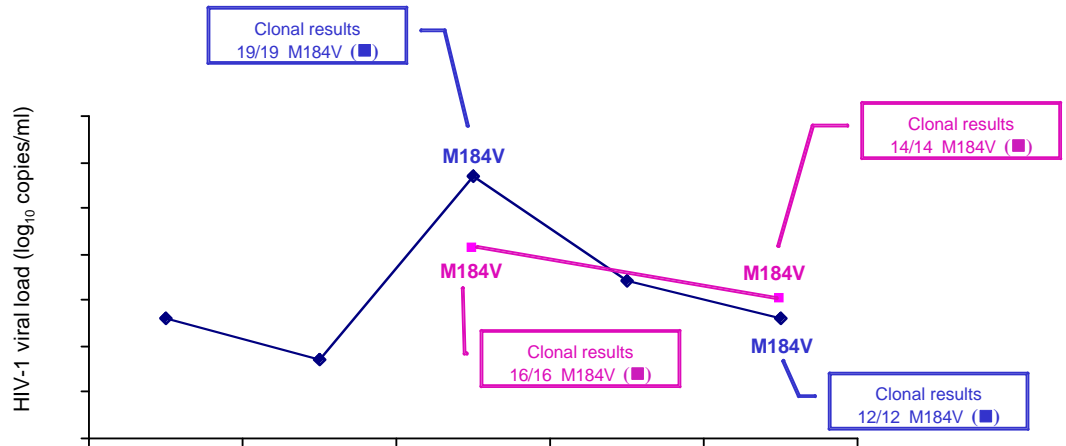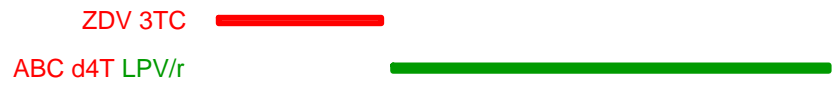

|               |                     |                |
|---------------|---------------------|----------------|
| Mother        | HIV-1-RNA (2.7 log) | Clonal results |
| ZDV 3TC IDV/r | HIV-1-DNA           | 9/9 WT (○)     |
|               |                     | not available  |
