# Supplementary material for: Perinatal acquisition of drug-resistant HIV-1 infection: mechanisms and long-term outcome
Source: Springer Nature journal article supplement (doi:10.1186/1742-4690-6-85), 2009-09-19
Supplement: 12977_2009_1090_MOESM3_ESM.pdf [file 12977_2009_1090_MOESM3_ESM.pdf]

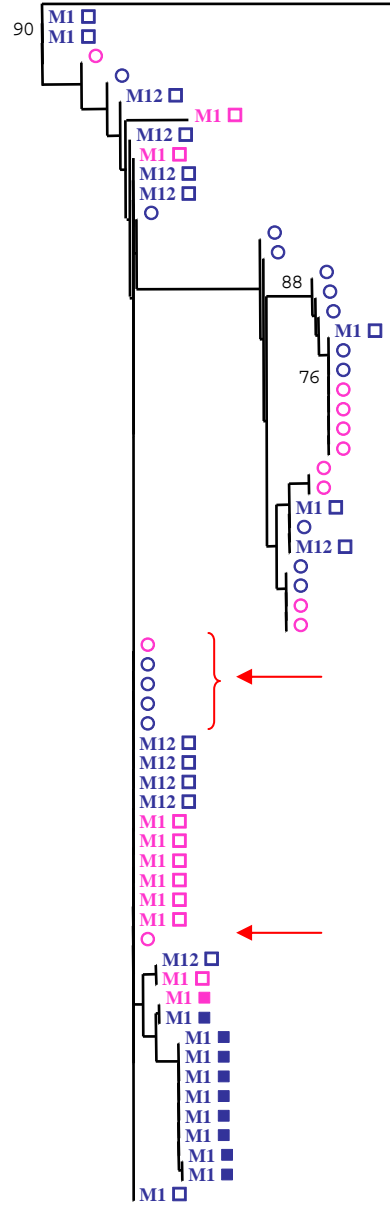

### Child #12

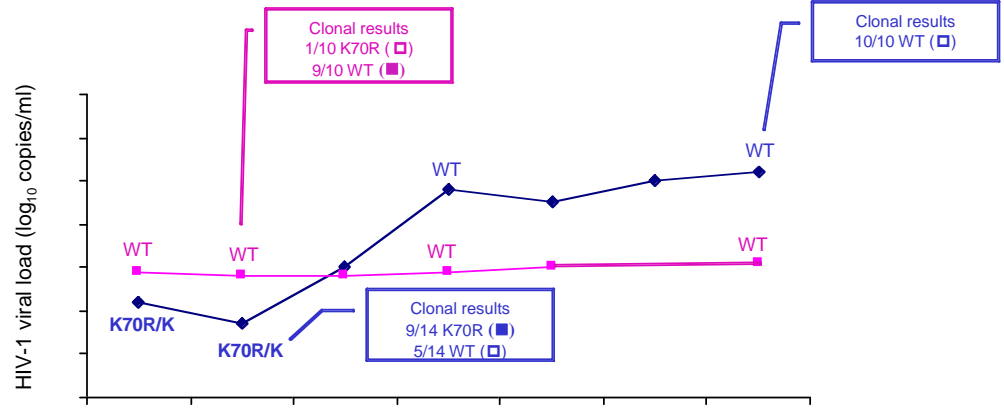

ZDV █

|               |                     |                       |
|---------------|---------------------|-----------------------|
| <b>Mother</b> | HIV-1-RNA (4.4 log) | <b>Clonal results</b> |
| ZDV 3TC IDV/r | HIV-1-DNA           | 16/16 WT (○)          |
|               |                     | 11/11 WT (○)          |
