# Supplementary material for: Perinatal acquisition of drug-resistant HIV-1 infection: mechanisms and long-term outcome
Source: Springer Nature journal article supplement (doi:10.1186/1742-4690-6-85), 2009-09-19
Supplement: 12977_2009_1090_MOESM4_ESM.pdf [file 12977_2009_1090_MOESM4_ESM.pdf]

**A****Primary infection of the newborn with resistant HIV-1**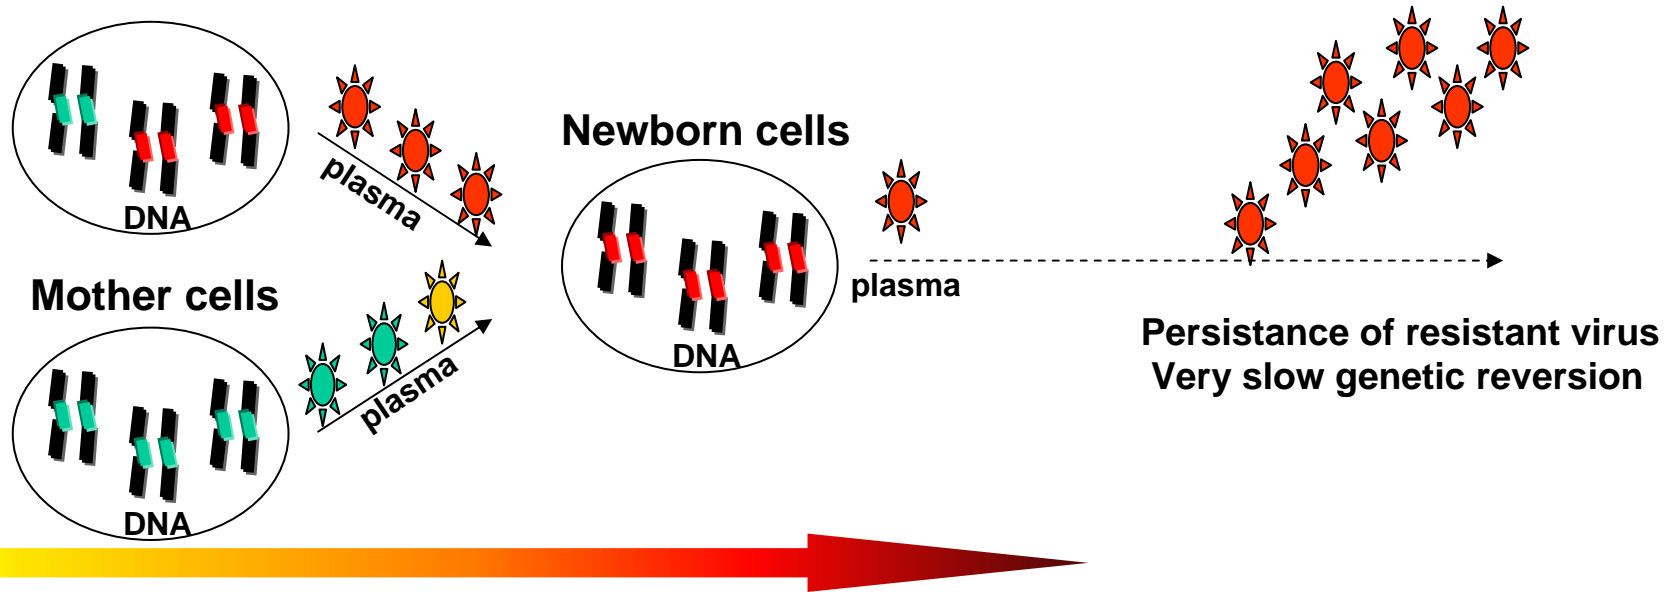

Transmission of resistant virus or primary infection under selective pressure of PTME

**B****Primary infection of the newborn with wild-type HIV-1**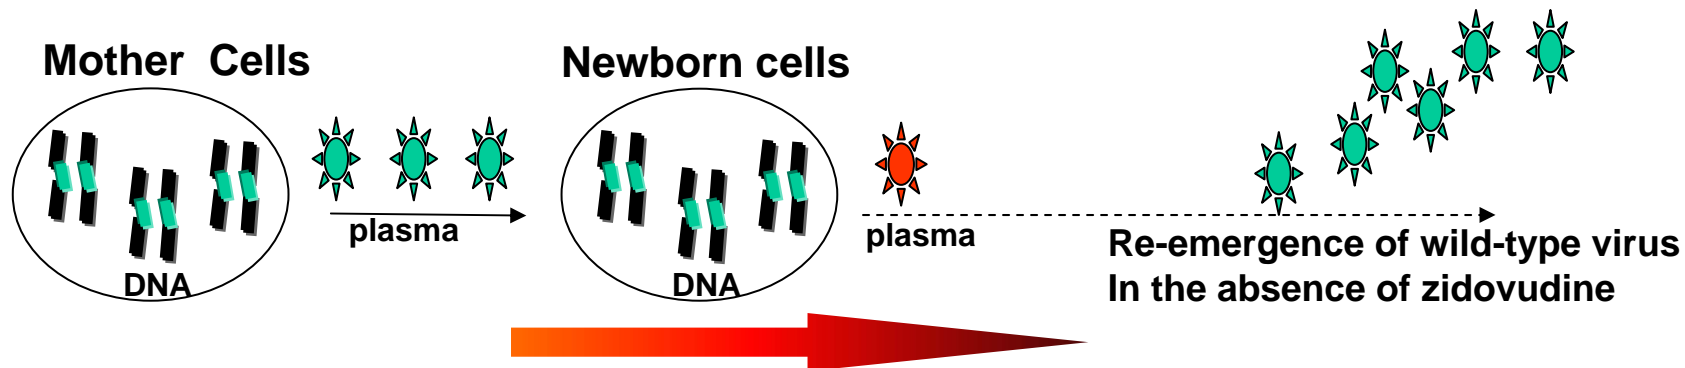

Transmission of wild-type virus and selection of resistant variants with PTME
